# Supplementary material
Source: PubMed Central journal article supplement (PMC3943212)
Supplement: NIHMS421420-supplement-Supplement.pdf [file NIHMS421420-supplement-Supplement.pdf]

## Supplementary Information for v410, 094

Table 1: Cl<sup>-</sup> channel properties and averaged macroscopic Cl<sup>-</sup> and HCO<sub>3</sub><sup>-</sup> transport mediated by WT CFTR and CFTR mutants.

| Mutation | CFTR Domain | <sup>a</sup> Channel NPo (%) | <sup>a</sup> Macroscopic Current (%) | Cl <sup>-</sup> transport mM/sec (n) | HCO <sub>3</sub> <sup>-</sup> transport pH units/min (n) | <sup>b</sup> Pancreatic Status (References) |
|----------|-------------|------------------------------|--------------------------------------|--------------------------------------|----------------------------------------------------------|---------------------------------------------|
| WT       |             | 100                          | 100                                  | 0.36±0.04(6)                         | 0.87±0.05(8)                                             |                                             |
| R117H    | EL1/TM2     | 28                           | 15                                   | 0.11±0.02(3)*                        | 0.53±0.04(3)                                             | PS (7)                                      |
| I148T    | CL1         | 100                          | 100                                  | 0.36±0.03(4)                         | 0.07±0.03 (4)                                            | PI (8)                                      |
| G178R    | CL1         | 75                           | 50                                   | 0.35±0.03(4)                         | 0.05±0.02(5)                                             | PI (9)                                      |
| E193K    | CL1         | 25                           | 100                                  | 0.33±0.02(5)                         | 0.29±0.03(4)                                             | PS (10)                                     |
| ΔF508    | NBD1        | -                            | -                                    | <sup>c</sup> 0.00 (4)                | <sup>c</sup> 0.00 (7)                                    | PI (7)                                      |
| G551D    | NBD1        | 15                           | 25 or 60                             | 0.19±0.03(4)*                        | 0.00(5)                                                  | PI (11)                                     |
| G551S    | NBD1        | Abnormal gating              | 100                                  | 0.41±0.02(4)                         | 0.36±0.02(5)                                             | PS (12)                                     |
| H620Q    | RD          | 150                          | 250                                  | 0.82±0.08(3)*                        | 0.12±0.05(4)                                             | PI (13)                                     |
| D648V    | RD          | -                            | 90                                   | 0.50±0.05(4)*                        | 0.55±0.06(4)                                             | PS (14)                                     |
| A800G    | RD          | 180                          | 350                                  | 0.91±0.09(4)*                        | 0.67±0.07(3)                                             | PS (10)                                     |
| H949Y    | CL3         | 200                          | 100                                  | 0.35±0.03(3)                         | 0.37±0.05(4)                                             | PS (15)                                     |
| G970R    | CL3         | 30                           | -                                    | 0.27±0.03(3)                         | 0.02±0.01(3)                                             | <sup>d</sup> PI                             |
| A1067T   | CL4         | 50                           | 50                                   | 0.49±0.06(5)*                        | 0.06±0.02(4)                                             | PI (16)                                     |
| R1070Q   | CL4         | 50                           | 50                                   | 0.37±0.04(4)                         | 0.41±0.03(5)                                             | PI/PS (17)                                  |
| G1244E   | NBD2        | Abnormal gating              | 100                                  | 0.36±0.04(5)                         | 0.00(5)                                                  | PI (18)                                     |
| S1255P   | NBD2        | Abnormal gating              | 100                                  | 0.42±0.03(3)                         | 0.01±0.01(5)                                             | PI (19)                                     |
| G1349D   | NBD2        | Abnormal gating              | 100                                  | 0.36±0.03(6)                         | 0.00(10)                                                 | PI (20)                                     |

Indicates different from WT CFTR, p<0.05; <sup>a</sup>Cl<sup>-</sup> channel properties were taken from reference 1-6 below and <sup>b</sup>pancreatic status of patients carrying the indicated CFTR mutations were taken from the references 7-20 below as listed in parenthesis next to the phenotypes. <sup>c</sup>Results were taken from reference 12. <sup>d</sup>Harry Cuppens, personal communication. Results are given as the Mean±S.E.M of the number of experiments indicated in parenthesis.

### References

1. Seibert FS, et al, Disease-associated mutations in cytoplasmic loops 1 and 2 cystic fibrosis transmembrane conductance regulator impede processing or opening of the channel. *Biochemistry* 36, 11966-11974, (1997).
2. Illek B, et al, Defective function of the cystic fibrosis-causing missense mutation G551D is recovered by genistein. *Am J Physiol* 277, C833-C839, (1999).
3. Anderson M, Welsh MJ, Regulation by ATP and ADP of CFTR chloride channels that contain mutant nucleotide-binding domains. *Science* 257,1701-1704, (1992).

4. Vankeerberghen A et al, Characterization of 19 disease-associated missense mutations in the regulatory domain of the cystic fibrosis transmembrane conductance regulator. *Human Molecular Genetics* 7, 1761-1769 (1998).
5. Seibert FS. et al, Cytoplasmic loop three of cystic fibrosis transmembrane conductance regulator contributes to regulation of chloride channel activity. *J Biol Chem* 271, 27493-27499, (1996).
6. Seibert FS, et al, Disease-associated mutations in the fourth cytoplasmic loop of cystic fibrosis transmembrane conductance regulator compromise biosynthetic processing and chloride channel activity. *J Biol Chem* 271, 15139-15145 (1996).
7. Kristidis P, et al, Genetic determination of exocrine pancreatic function in cystic fibrosis. *Am J Hum Genet* 50, 1178-1184 (1992).
8. Bozon D, Zielenski J, Rininsland F, Tsui LC, Identification of four new mutations in the cystic fibrosis transmembrane conductance regulator gene: I148T, L1077P, Y1092X, 2183AA-->G. *Human mutation* 3, 330-332, (1994).
9. Zielenski J et al, Identification of mutations in exons 1 through 8 of the cystic fibrosis transmembrane conductance regulator (CFTR) gene. *Genomics* 10, 229-235, (1991).
10. Mercier B, et al, Is congenital bilateral absence of vas deferens a primary form of cystic fibrosis? Analyses of the CFTR gene in 67 patients. *Am J Hum Genet* 56, 272-277, (1995).
11. Hughes DJ, et al. Mutation characterization of CFTR gene in 206 Northern Irish CF families: thirty mutations, including two novel, account for approximately 94% of CF chromosomes. *Hum Mutat.* 8:340-347, (1996).
12. Strong TV, et al, Cystic fibrosis gene mutation in two sisters with mild disease and normal sweat electrolyte levels. *New Eng. J Med* 325, 1630-1634, (1991).
13. Vankeerberghen A et al, Characterization of 19 disease-associated missense mutations in the regulatory domain of the cystic fibrosis transmembrane conductance regulator. *Human Molecular Genetics* 7, 1761-1769 (1998).
14. Mercier B, et al, Complete detection of mutations in cystic fibrosis patients of Native American origin. *Hum Genet* 94, 629-632, (1994).
15. Ghanem N, et al, Identification of eight mutations and three sequence variations in the cystic fibrosis transmembrane conductance regulator (CFTR) gene. *Genomics* 21, 434-436, (1994).
16. Ferec C, et al, Detection of over 98% cystic fibrosis mutations in a Celtic population. *Nat Genet* 1, 188-191, (1992).
17. Mercier B et al, Identification of eight novel mutations in a collaborative analysis of a part of the second transmembrane domain of the CFTR gene. *Genomics* 16, 296-297, (1993).
18. Devoto M et al, Screening for non-delta F508 mutations in five exons of the cystic fibrosis transmembrane conductance regulator (CFTR) gene in Italy. *Am J Hum Genet* 48, 1127-1132, (1991).
19. Lissens W, Bonduelle M, Malfroot A, Dab I, Liebaers I. A serine to proline substitution (S1255P) in the second nucleotide binding fold of the cystic fibrosis gene. *Human Mol. Genetics* 1, 441- 442, (1992).
20. Gregory RJ et al, Maturation and function of cystic fibrosis transmembrane conductance regulator variants bearing mutations in putative nucleotide-binding domains 1 and 2. *Mol. Cellular. Biol.* 11, 3886-3893, (1991).
